# Supplementary material for: Plastid and mitochondrion genomic sequences from Arctic Chlorella sp. ArM0029B
Source: PubMed Central journal article supplement (PMC4023601; doi:10.1186/1471-2164-15-286), 2014-04-16

# Additional Figure S3.

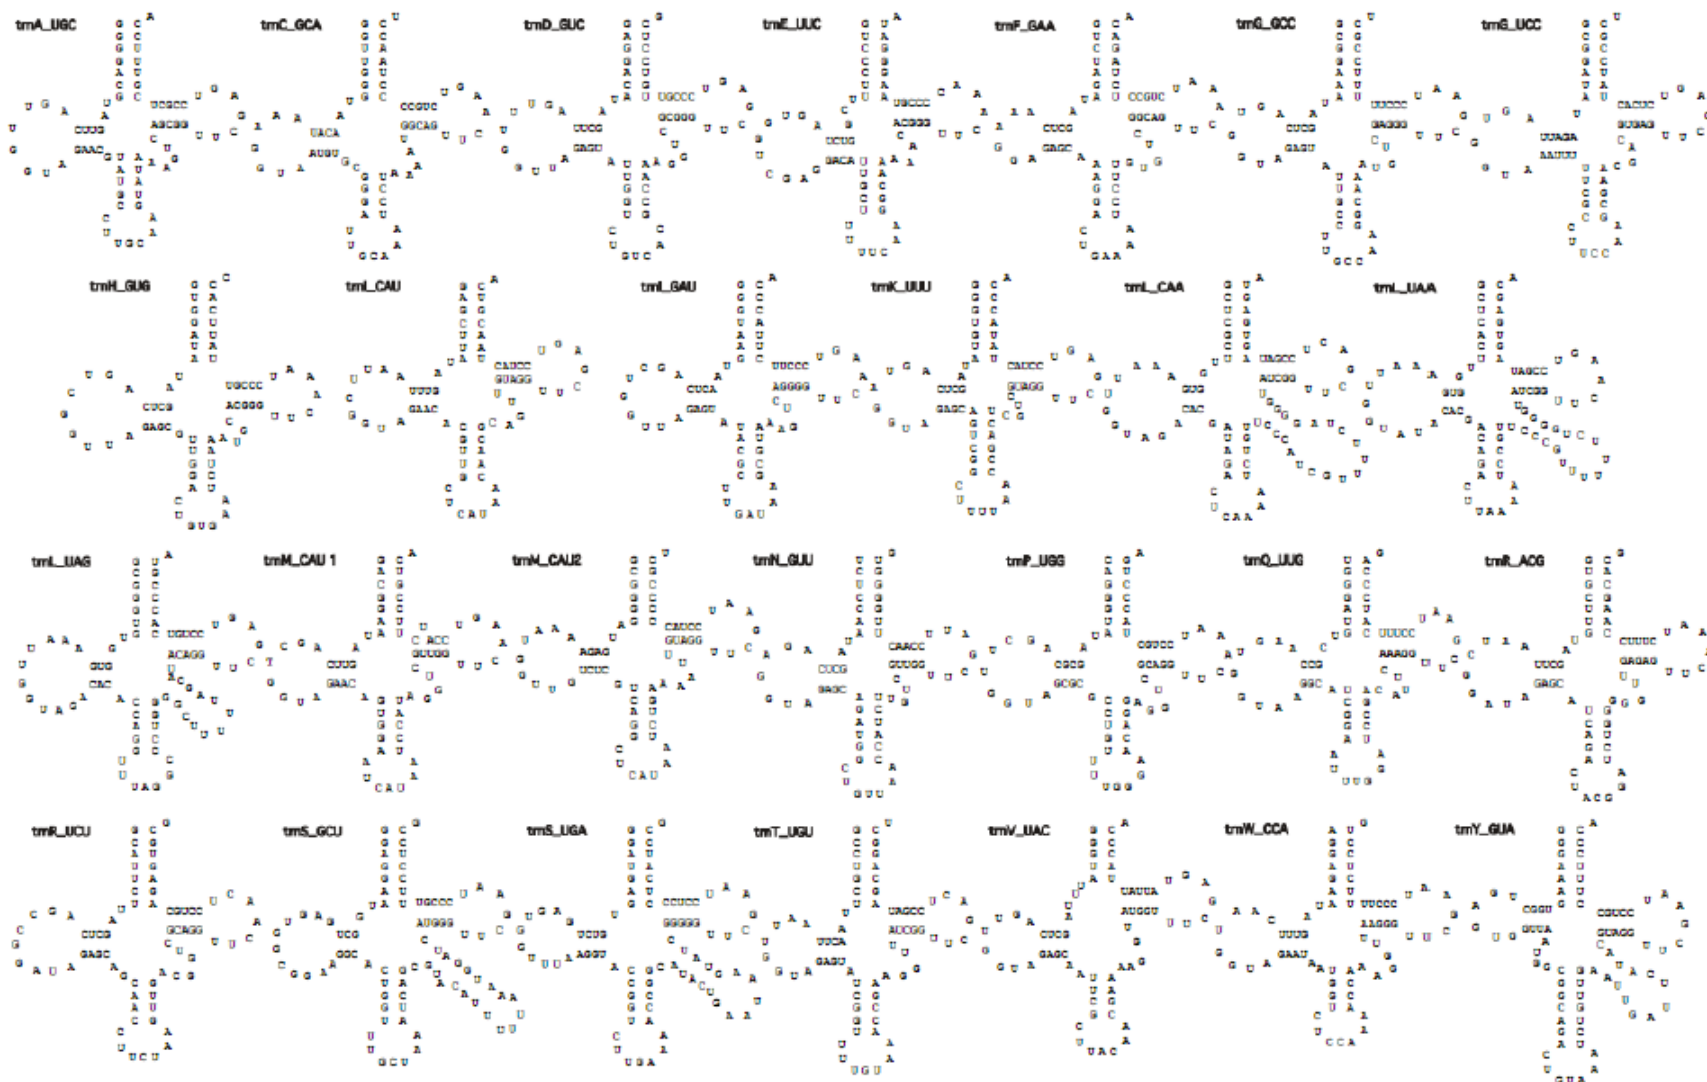

Supplement: 1471-2164-15-286-S4.pdf [file 1471-2164-15-286-S4.pdf]
