# Supplementary material for: Plastid and mitochondrion genomic sequences from Arctic Chlorella sp. ArM0029B
Source: PubMed Central journal article supplement (PMC4023601; doi:10.1186/1471-2164-15-286), 2014-04-16
Supplement: 1471-2164-15-286-S6.pdf [file 1471-2164-15-286-S6.pdf]

**Additional Table S2.**

| Taxa                    | 1       | 2       | 3       | 4       | 5       | 6       | 7 |
|-------------------------|---------|---------|---------|---------|---------|---------|---|
| 1. ArM0029B             | -       |         |         |         |         |         |   |
| 2. <i>C. variabilis</i> | 0.09193 | -       |         |         |         |         |   |
| 3. <i>C. vulgaris</i>   | 0.10299 | 0.09403 | -       |         |         |         |   |
| 4. <i>Parachlorella</i> | 0.14071 | 0.14585 | 0.14328 | -       |         |         |   |
| 5. <i>Oocystis</i>      | 0.15911 | 0.16435 | 0.16287 | 0.14959 | -       |         |   |
| 6. <i>Coccomyxa</i>     | 0.22321 | 0.22932 | 0.22689 | 0.23112 | 0.22422 | -       |   |
| 7. MX-AZ01              | 0.25442 | 0.25684 | 0.25652 | 0.26705 | 0.2589  | 0.16901 | - |
